# Supplementary material
Source: Springer Nature journal article supplement (https://www.springermedizin.de/resource/supplementary/12943_2013_1211_MOESM2_ESM.pdf/9552398)

**A**

QSG7701

HepG2

SMMC7721

Huh7

Bel7402

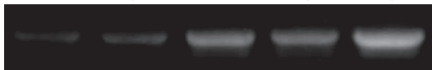

DKK1

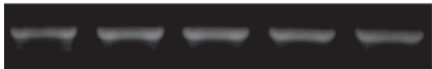

GAPDH

**B**

QSG7701

HepG2

SMMC7721

Huh7

Bel7402

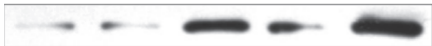

DKK1

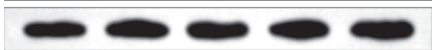 $\beta$ -actin

Supplement: MOESM2 [file 9552398]
